# Supplementary material
Source: PubMed Central journal article supplement (PMC9360227)
Supplement: ajcr0012-3067-f7.pdf [file ajcr0012-3067-f7.pdf]

## PI3K inhibitors in HER2-positive breast cancer

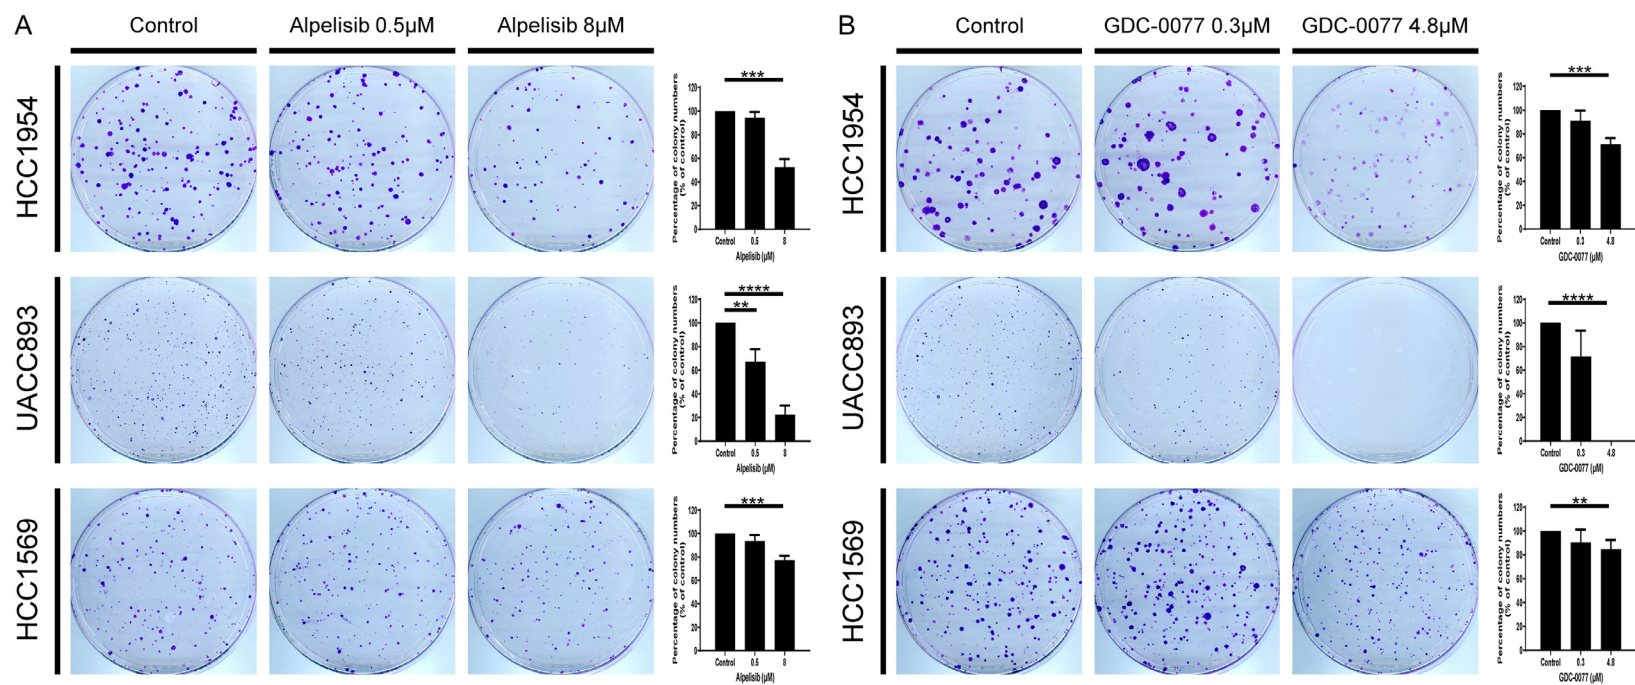

**Figure S1.** Colony formation assays. A. HCC1954, UACC893, and HCC1569 cells were treated with DMSO, alpelisib (0.5  $\mu$ M), and alpelisib (8  $\mu$ M). B. Cells were treated with DMSO, GDC-0077 (0.3  $\mu$ M), and GDC-0077 (4.8  $\mu$ M). Bar charts represent quantification of the colonies and are shown as the mean  $\pm$  SD. *P*-value: \*\**P*<0.01, \*\*\**P*<0.001, and \*\*\*\**P*<0.0001.

## PI3K inhibitors in HER2-positive breast cancer

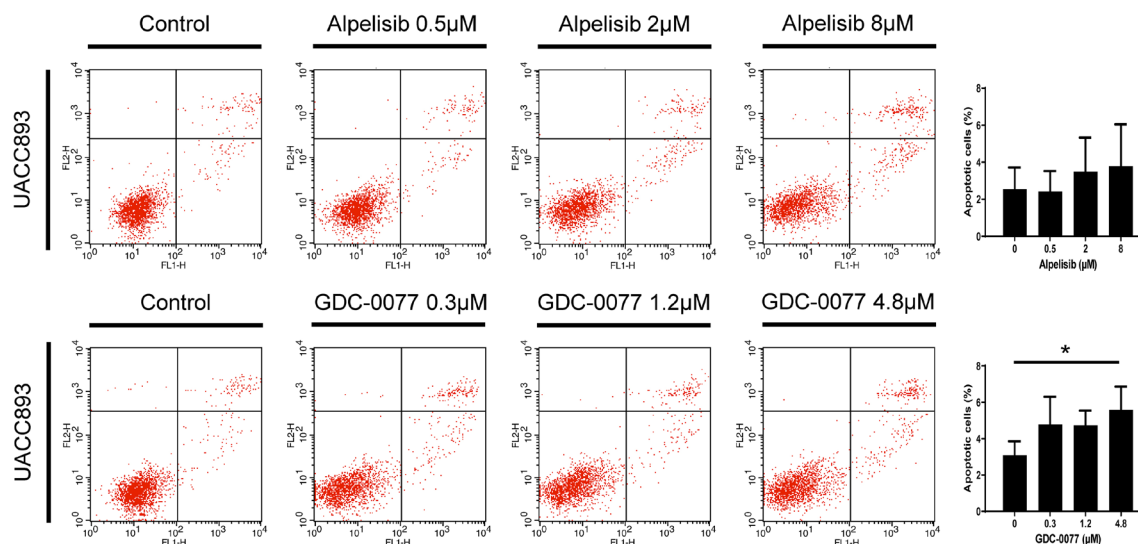

**Figure S2.** PI3K inhibitors induce apoptosis in UACC893 cells. Cells were treated with alpelisib and GDC-0077 at the indicated concentrations then stained with annexin V/PI. Apoptotic events were analyzed by flow cytometry 48 hours after treatment. Bar charts represent the mean percentage of apoptotic cells  $\pm$  SD. *P*-value: \**P*<0.05.

**Table S1.** Combination index of alpelisib plus trastuzumab in HCC1954, UACC893, and HCC1569 cells

| HCC1954                          |                             |        |                   |
|----------------------------------|-----------------------------|--------|-------------------|
| Trastuzumab ( $\mu\text{g/mL}$ ) | Alpelisib ( $\mu\text{M}$ ) | Effect | Combination index |
| 0.5                              | 0.125                       | 0.7777 | 0.07750           |
| 1.0                              | 0.25                        | 0.7385 | 0.14249           |
| 2.0                              | 0.5                         | 0.6969 | 0.26286           |
| 4.0                              | 1.0                         | 0.647  | 0.48090           |
| 8.0                              | 2.0                         | 0.5279 | 0.79202           |
| 16.0                             | 4.0                         | 0.3742 | 1.23856           |
| UACC893                          |                             |        |                   |
| Trastuzumab ( $\mu\text{g/mL}$ ) | Alpelisib ( $\mu\text{M}$ ) | Effect | Combination index |
| 0.5                              | 0.125                       | 0.8003 | 0.27131           |
| 1.0                              | 0.25                        | 0.6761 | 0.31380           |
| 2.0                              | 0.5                         | 0.5638 | 0.41967           |
| 4.0                              | 1.0                         | 0.4629 | 0.59725           |
| 8.0                              | 2.0                         | 0.3509 | 0.80744           |
| 16.0                             | 4.0                         | 0.2163 | 0.91832           |
| HCC1569                          |                             |        |                   |
| Trastuzumab ( $\mu\text{g/mL}$ ) | Alpelisib ( $\mu\text{M}$ ) | Effect | Combination index |
| 0.5                              | 0.125                       | 0.8732 | 0.18533           |
| 1.0                              | 0.25                        | 0.8488 | 0.24848           |
| 2.0                              | 0.5                         | 0.84   | 0.43589           |
| 4.0                              | 1.0                         | 0.7923 | 0.46663           |
| 8.0                              | 2.0                         | 0.7433 | 0.54423           |
| 16.0                             | 4.0                         | 0.5975 | 0.29471           |

## PI3K inhibitors in HER2-positive breast cancer

**Table S2.** Combination index of GDC-0077 plus trastuzumab in HCC1954, UACC893, and HCC1569 cells

| HCC1954             |               |        |                   |
|---------------------|---------------|--------|-------------------|
| Trastuzumab (µg/mL) | GDC-0077 (µM) | Effect | Combination index |
| 0.5                 | 0.05          | 0.8286 | 0.40245           |
| 1.0                 | 0.1           | 0.734  | 0.19876           |
| 2.0                 | 0.2           | 0.6709 | 0.18681           |
| 4.0                 | 0.4           | 0.6485 | 0.29128           |
| 8.0                 | 0.8           | 0.5579 | 0.22590           |
| 16.0                | 1.6           | 0.4418 | 0.14113           |
| UACC893             |               |        |                   |
| Trastuzumab (µg/mL) | GDC-0077 (µM) | Effect | Combination index |
| 0.5                 | 0.0125        | 0.8938 | 0.60198           |
| 1.0                 | 0.025         | 0.8358 | 0.77614           |
| 2.0                 | 0.05          | 0.6681 | 0.69091           |
| 4.0                 | 0.1           | 0.4937 | 0.73441           |
| 8.0                 | 0.2           | 0.3376 | 0.83433           |
| 16.0                | 0.4           | 0.2487 | 1.14560           |
| HCC1569             |               |        |                   |
| Trastuzumab (µg/mL) | GDC-0077 (µM) | Effect | Combination index |
| 0.5                 | 0.1           | 0.8722 | 0.15071           |
| 1.0                 | 0.2           | 0.8397 | 0.22781           |
| 2.0                 | 0.4           | 0.8306 | 0.42484           |
| 4.0                 | 0.8           | 0.7281 | 0.44795           |
| 8.0                 | 1.6           | 0.6111 | 0.50962           |
| 16.0                | 3.2           | 0.3995 | 0.41043           |

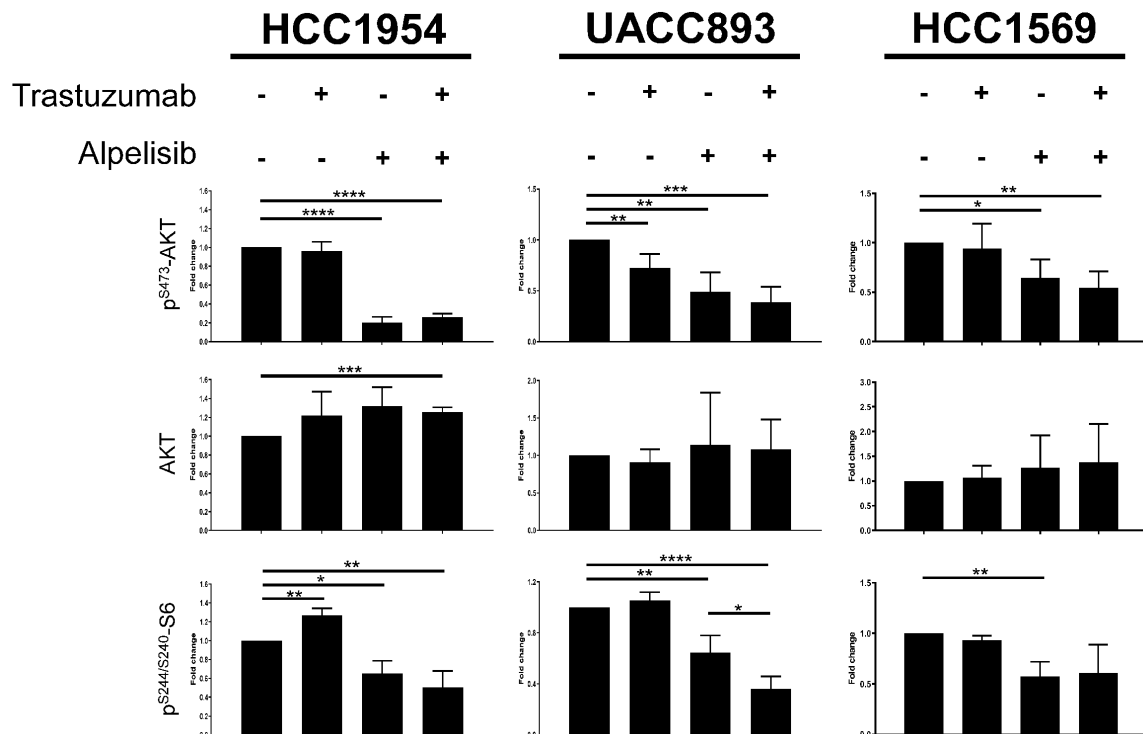

## PI3K inhibitors in HER2-positive breast cancer

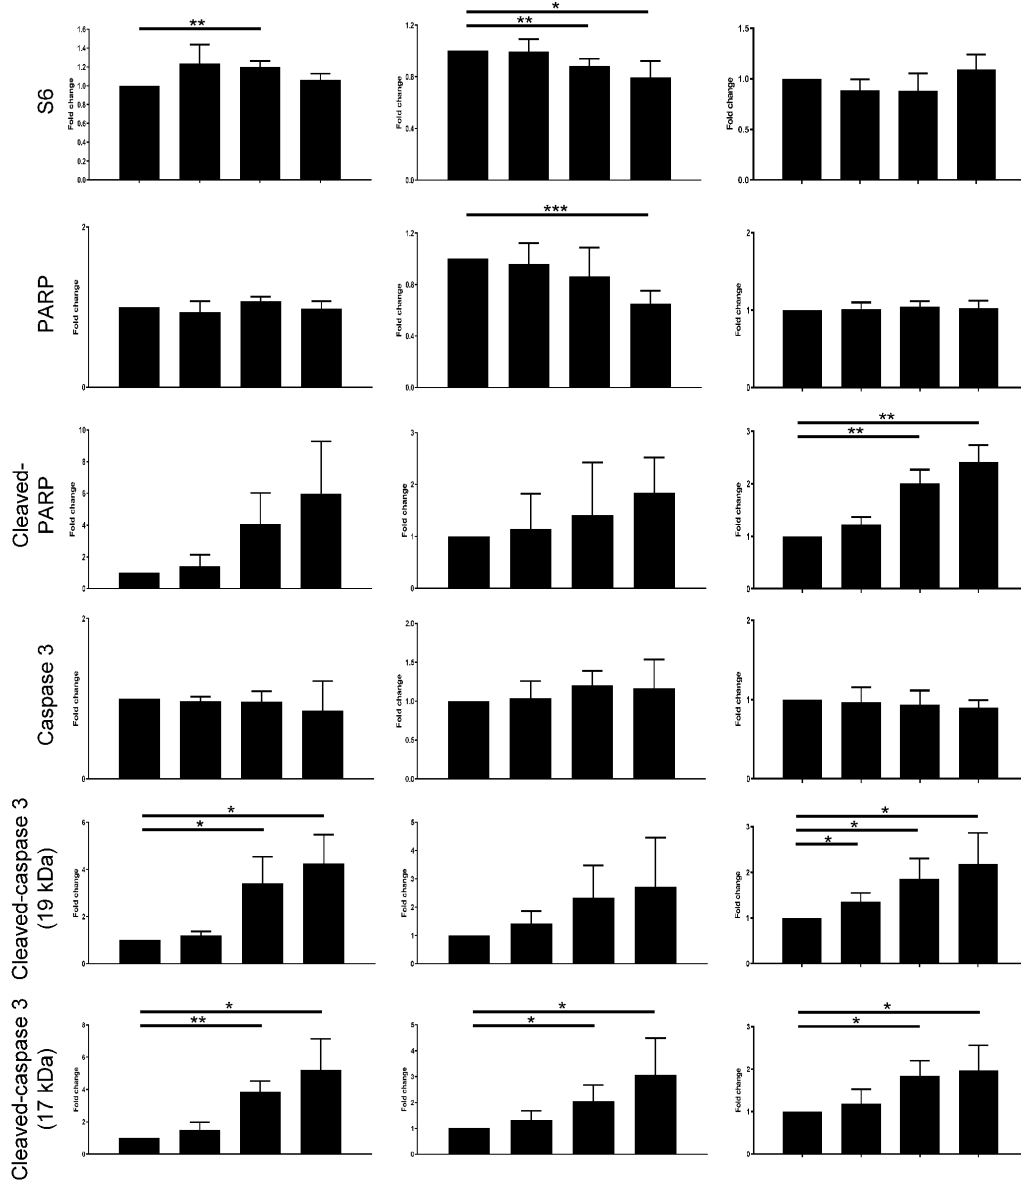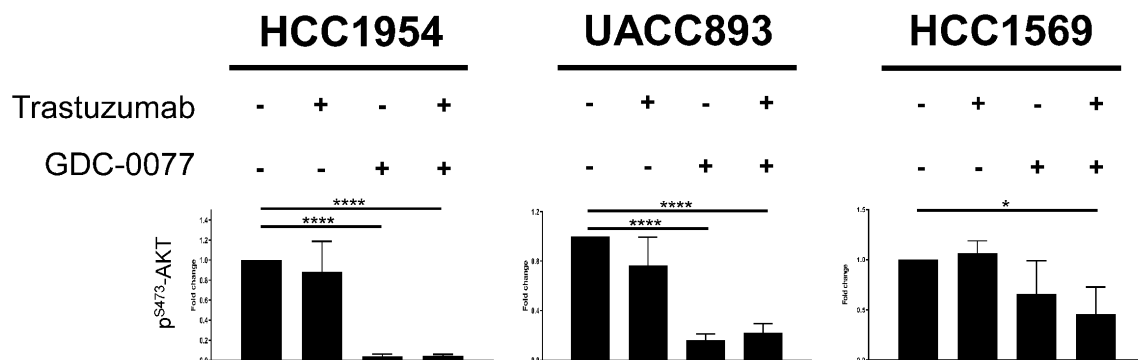

## PI3K inhibitors in HER2-positive breast cancer

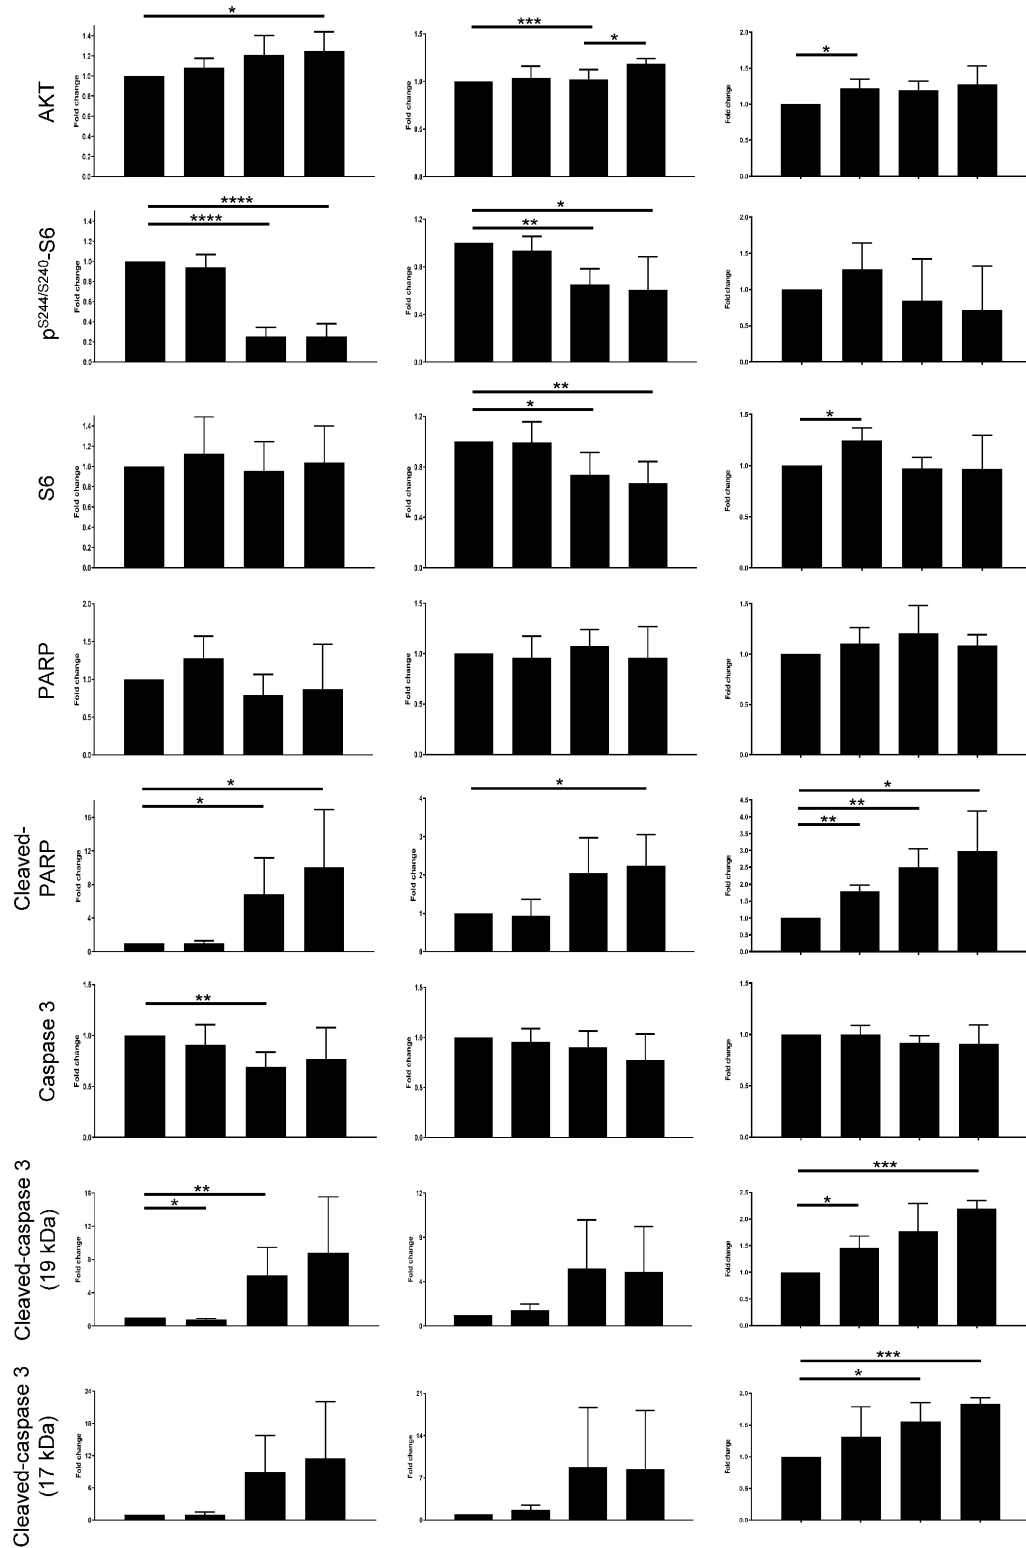

**Figure S4.** Quantification of western blots for cells treated with GDC-0077 and trastuzumab. The intensity of each indicated protein relative to the control was calculated. Bar charts represent the mean  $\pm$  SD. *P*-value: \**P*<0.05, \*\**P*<0.01, \*\*\**P*<0.001, and \*\*\*\**P*<0.0001.
